# Supplementary material
Source: PubMed Central journal article supplement (PMC7132197)

| Figure and N of animals                                             | Statistical analysis                                                              | Post hoc tests                                                               | Mean±s.e.m.                                                                                                                  |
|---------------------------------------------------------------------|-----------------------------------------------------------------------------------|------------------------------------------------------------------------------|------------------------------------------------------------------------------------------------------------------------------|
| <b>1B</b><br>Control (n=44)<br>Susceptible(n=55)<br>Resilient(n=44) |                                                                                   | Uncorrected Fisher's<br>LSD<br>Control vs.<br>Susceptible,<br>p<0.0001       |                                                                                                                              |
| <b>1C</b><br>Control (n=20)<br>Susceptible(n=20)<br>Resilient(n=12) | One-way ANOVA<br>F (2, 49) = 16.05,<br>P < 0.0001                                 | Control vs. Resilient,<br>p=0.3384<br>Susceptible vs.<br>Resilient, p=0.0005 | Control : 80±1.689<br>Susceptible : 64.85±<br>2.222<br>Resilient : 77.1±2.688                                                |
| <b>1D</b><br>Control (n=16)<br>Susceptible(n=32)                    | Student's <i>t</i> test<br>p=0.002                                                |                                                                              | C 97.56±12.04<br>S 143.8±7.981                                                                                               |
| <b>1E</b><br>Control (n=17)<br>Susceptible(n=35)                    | Student's <i>t</i> test<br>P=0.0003                                               |                                                                              | C 115±8.682<br>S 157.1±6.223                                                                                                 |
| <b>1F</b><br>Control (n=19)<br>Susceptible(n=33)                    | Student's <i>t</i> test<br>p<0.0001                                               |                                                                              | C 34.97±4.262<br>S 14.46±2.25                                                                                                |
| <b>1G</b><br>Control (n=19)<br>Susceptible(n=33)                    | Student's <i>t</i> test<br>p<0.0001                                               |                                                                              | C 218.1± 5.559<br>S 248.5± 4.282                                                                                             |
| <b>1H</b><br>Control (n=13)<br>Susceptible(n=28)                    | Student's <i>t</i> test<br>p=0.0089                                               |                                                                              | C 164.6±19.73<br>S 106.1±11.26                                                                                               |
| <b>1I</b><br>Control (n=7)<br>CSDS(n=8)                             | Student's <i>t</i> test<br>cd39, P=0.0002<br>ENTPD2, P=0.0025<br>ENTPD3, P=0.2041 |                                                                              | C 1.000 ± 0.05904 S<br>1.391 ± 0.04961<br>C 1.000 ± 0.06951 S<br>0.6267 ± 0.07111<br>C 1.000 ± 0.04461 S<br>0.8471 ± 0.09919 |
| <b>1J</b><br>Control (n=6)<br>CSDS(n=7)                             | Student's <i>t</i> test<br>p=0.0003                                               |                                                                              | C 1.002±0.09607<br>S 1.581±0.06349                                                                                           |
| <b>1K</b><br>Control (n=6)<br>CSDS(n=6)                             | Student's <i>t</i> test<br>P=0.0041                                               |                                                                              | C 2.23 ± 0.19<br>S 3.54± 0.30                                                                                                |

Figure 1E control: n=6; CSDS: n=7

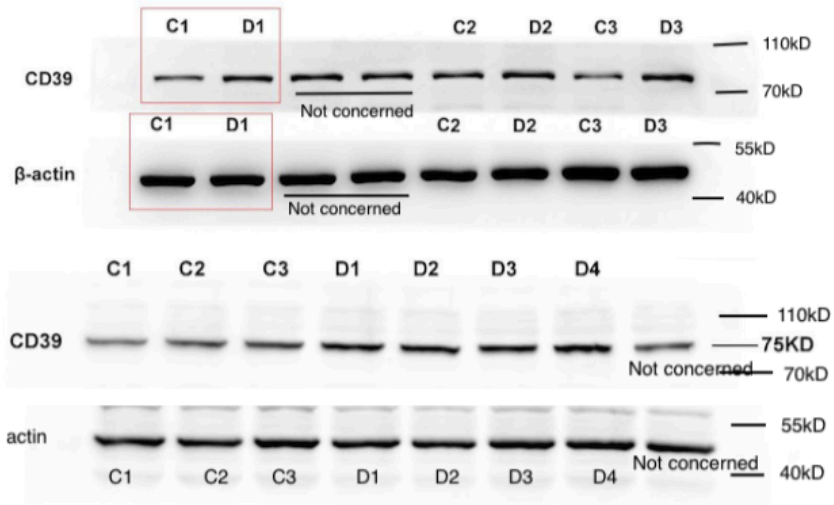

Supplement: EMBR-21-e47857-s004.pdf [file EMBR-21-e47857-s004.pdf]
