# Supplementary material
Source: PubMed Central journal article supplement (PMC7132197)

| Figure and N of animals                                  | Statistical analysis                                                                                                          | Post hoc tests                                                                                                      | Mean±s.e.m.                                                                                                              |
|----------------------------------------------------------|-------------------------------------------------------------------------------------------------------------------------------|---------------------------------------------------------------------------------------------------------------------|--------------------------------------------------------------------------------------------------------------------------|
| 4C<br>LV-GFP(n=6)<br>LV-siCD39(n=6)                      | t tests<br>P=0.0006                                                                                                           |                                                                                                                     | LV-GFP 0.9961±0.051<br>LV-siCD39 0.5478±0.07605                                                                          |
| 4D<br>CON GFP(n=15)<br>CSDS GFP(n=15)<br>CSDS CD39(N=14) | Two-way ANOVA<br>F (2, 41) = 17.96,<br>P < 0.0001<br>F (1, 41) = 3.751e-005<br>P = 0.9951<br>F (2, 41) = 6.099,<br>P = 0.0048 | Tukey's multiple comparisons test<br>Con LV-GFP vs. CSDS LV-GFP P< 0.0001<br>CSDS LV-GFP vs. CSDS LV-CD39 P< 0.0001 | CON GFP NT 46.79±5.44 T<br>61.3±5.52<br>CSDS GFP NT 44.17±4.61 T<br>19.9±3.86<br>CSDS CD39 NT 47.13±5.42 T<br>56.84±7.03 |
| 4E<br>CON GFP(n=11)<br>CSDS GFP(n=19)<br>CSDS CD39(N=15) | One-way ANOVA<br>F <sub>2, 42</sub> = 5.807, P = 0.0059                                                                       | Uncorrected Fisher's LSD<br>Con LV-GFP vs. CSDS LV-GFP P=0.0069<br>CSDS LV-GFP vs. CSDS LV-CD39 P=0.0065            | CON GFP 104.3±14.76<br>CSDS GFP 158.6±11.65<br>CSDS CD39 108.7±13.18                                                     |
| 4F<br>CON GFP(n=12)<br>CSDS GFP(n=19)<br>CSDS CD39(N=15) | One-way ANOVA<br>F <sub>2, 43</sub> = 5.237, P = 0.0092                                                                       | Uncorrected Fisher's LSD<br>Con LV-GFP vs. CSDS LV-GFP P=0.0095<br>CSDS LV-GFP vs. CSDS LV-CD39 P=0.0093            | CON GFP 107.1±9.944<br>CSDS GFP 146.5±8.712<br>CSDS CD39 109.5±11.44                                                     |
| 4G<br>CON GFP(n=5)<br>CSDS GFP(n=6)<br>CSDS CD39(N=5)    | One-way ANOVA<br>F (2, 13) = 8.45, P = 0.0044                                                                                 | Uncorrected Fisher's LSD<br>Con LV-GFP vs. CSDS LV-GFP P=0.0016<br>CSDS LV-GFP vs. CSDS LV-CD39 P=0.0166            | CON GFP 3.318±0.3771<br>CSDS GFP 5.818±0.4944<br>CSDS CD39 4.09±0.4392                                                   |
| 4H<br>CON GFP(n=5)<br>CSDS GFP(n=5)<br>CSDS CD39(N=5)    | One-way ANOVA<br>F (2, 12) = 6.045,<br>P = 0.0153                                                                             | Uncorrected Fisher's LSD<br>Con LV-GFP vs. CSDS LV-GFP P=0.0444<br>CSDS LV-GFP vs. CSDS LV-CD39 P=0.0051            | CON GFP 1.923±0.1737<br>CSDS GFP 0.8206±0.2229<br>CSDS CD39 2.502±0.5312                                                 |

Figure 4C n=6 mice/group

Con Con siRNA siRNA

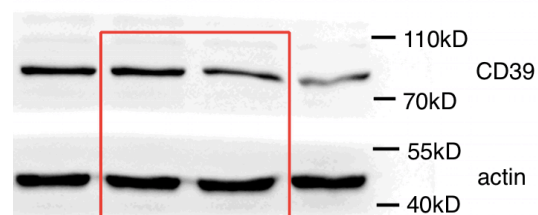

Supplement: EMBR-21-e47857-s007.pdf [file EMBR-21-e47857-s007.pdf]
