# Supplementary material
Source: PubMed Central journal article supplement (PMC7132197)
Supplement: EMBR-21-e47857-s002.pdf [file EMBR-21-e47857-s002.pdf]

## Expanded View Figures

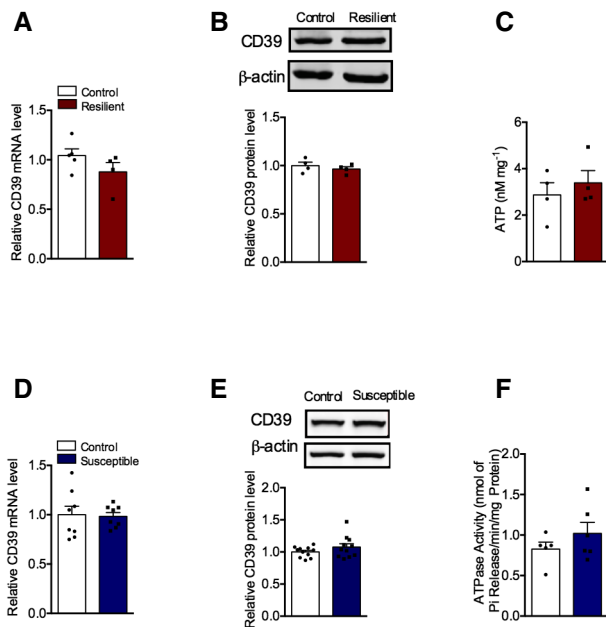

**Figure EV1. The CD39 expression and activity in hippocampus of stress resilient mice and in mPFC of stress susceptible mice.**

- A The CD39 mRNA level in the hippocampus of resilient mice exposure to CSDS ( $n = 5, 4$  mice; resilient versus control,  $P = 0.1888$ , Student's  $t$ -test).
- B The expression of CD39 protein in the hippocampus of resilient mice exposure to CSDS ( $n = 4$  mice/group; resilient versus control,  $P = 0.4403$ , Student's  $t$ -test).
- C The ATP level in the hippocampus of resilient mice exposure to CSDS ( $n = 4$  mice/group; resilient versus control,  $P = 0.5084$ , Student's  $t$ -test).
- D The CD39 mRNA level in the mPFC of susceptible mice after CSDS ( $n = 8$  mice/group; CSDS versus control,  $P = 0.8592$ , Student's  $t$ -test).
- E The expression of CD39 protein in the mPFC of susceptible mice induced by CSDS ( $n = 11$  mice/group; CSDS versus control,  $P = 0.1194$ , Student's  $t$ -test).
- F The ATPase activity in the mPFC of stressed mice ( $n = 5, 6$  mice; CSDS versus control,  $P = 0.2827$ , Student's  $t$ -test).

Data information: Data are expressed as the means  $\pm$  SEM.

Source data are available online for this figure.

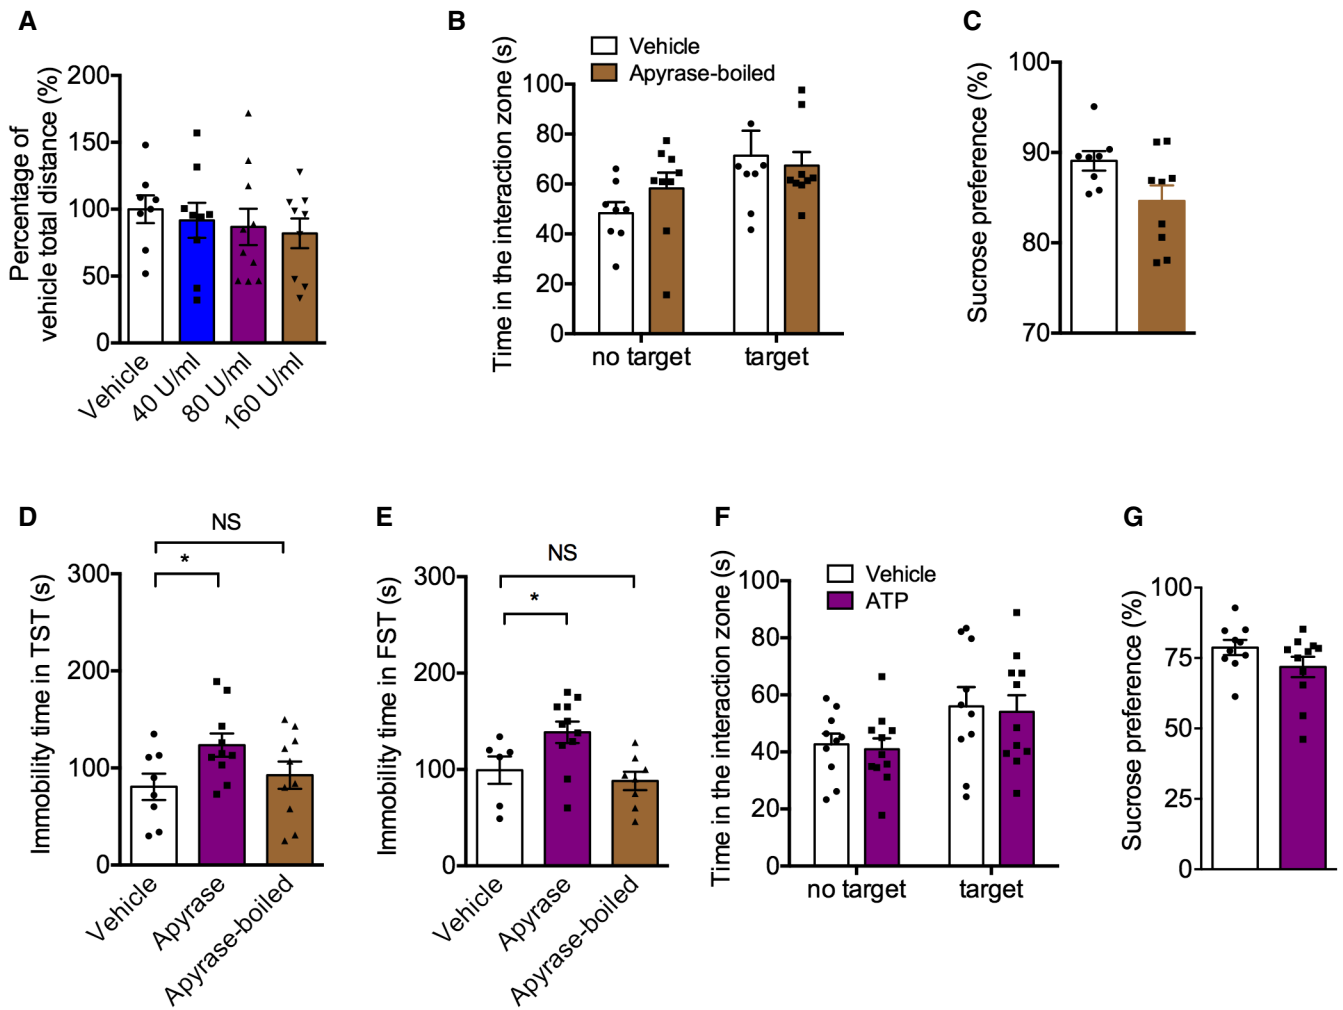

**Figure EV2. The effects of apyrase or ATP on locomotor activity and depressive behaviors in normal mice.**

**A** The locomotor activity of mice with apyrase (40, 80, or 160 U/ml) infusion into lateral intracerebroventricular in the open field test ( $n = 8, 9, 10, 9$  mice; Treatment  $F_{3,32} = 0.37$ ,  $P = 0.7757$ , one-way ANOVA with Fisher's LSD test).

**B, C** Social interaction time (**B**) and sucrose preference (**C**) of mice with inactivated apyrase infusion into hippocampus ( $n = 8, 9$  mice; for SI, Interaction  $F_{1,30} = 1.039$ ,  $P = 0.3162$ ; Drug  $F_{1,30} = 5.591$ ,  $P = 0.0247$ ; Target  $F_{1,30} = 0.1890$ ,  $P = 0.6669$ , two-way ANOVA with Tukey's post-test; for SPT,  $P = 0.0517$ , Student's  $t$ -test).

**D, E** Immobility time in the TST (**D**) and FST (**E**) of mice with apyrase and boiled-apyrase (for TST,  $n = 8, 10, 10$  mice; Treatment  $F_{2,25} = 2.766$ ,  $P = 0.0822$ ; Apyrase versus vehicle,  $P = 0.0348$ ; Apyrase-boiled versus vehicle,  $P = 0.5386$ ; for FST,  $n = 6, 11, 8$  mice; Treatment  $F_{2,22} = 5.92$ ,  $P = 0.0088$ ; Apyrase versus vehicle,  $P = 0.0307$ ; Apyrase-boiled versus vehicle,  $P = 0.5414$ , one-way ANOVA with Fisher's LSD test).

**F, G** Social interaction time (**F**) and sucrose preference (**G**) of normal mice with ATP (25  $\mu$ M) infusion into hippocampus ( $n = 10, 11$  mice; for SI, Interaction  $F_{1,38} = 0.0005723$ ,  $P = 0.9810$ ; Drug  $F_{1,38} = 6.520$ ,  $P = 0.0148$ ; Target  $F_{1,38} = 0.1280$ ,  $P = 0.7225$ , two-way ANOVA with Tukey's post-test; for SPT,  $P = 0.1484$ , Student's  $t$ -test).

Data information: Data are expressed as the means  $\pm$  SEM. NS  $P > 0.05$ ; \* $P < 0.05$ . Source data are available online for this figure.

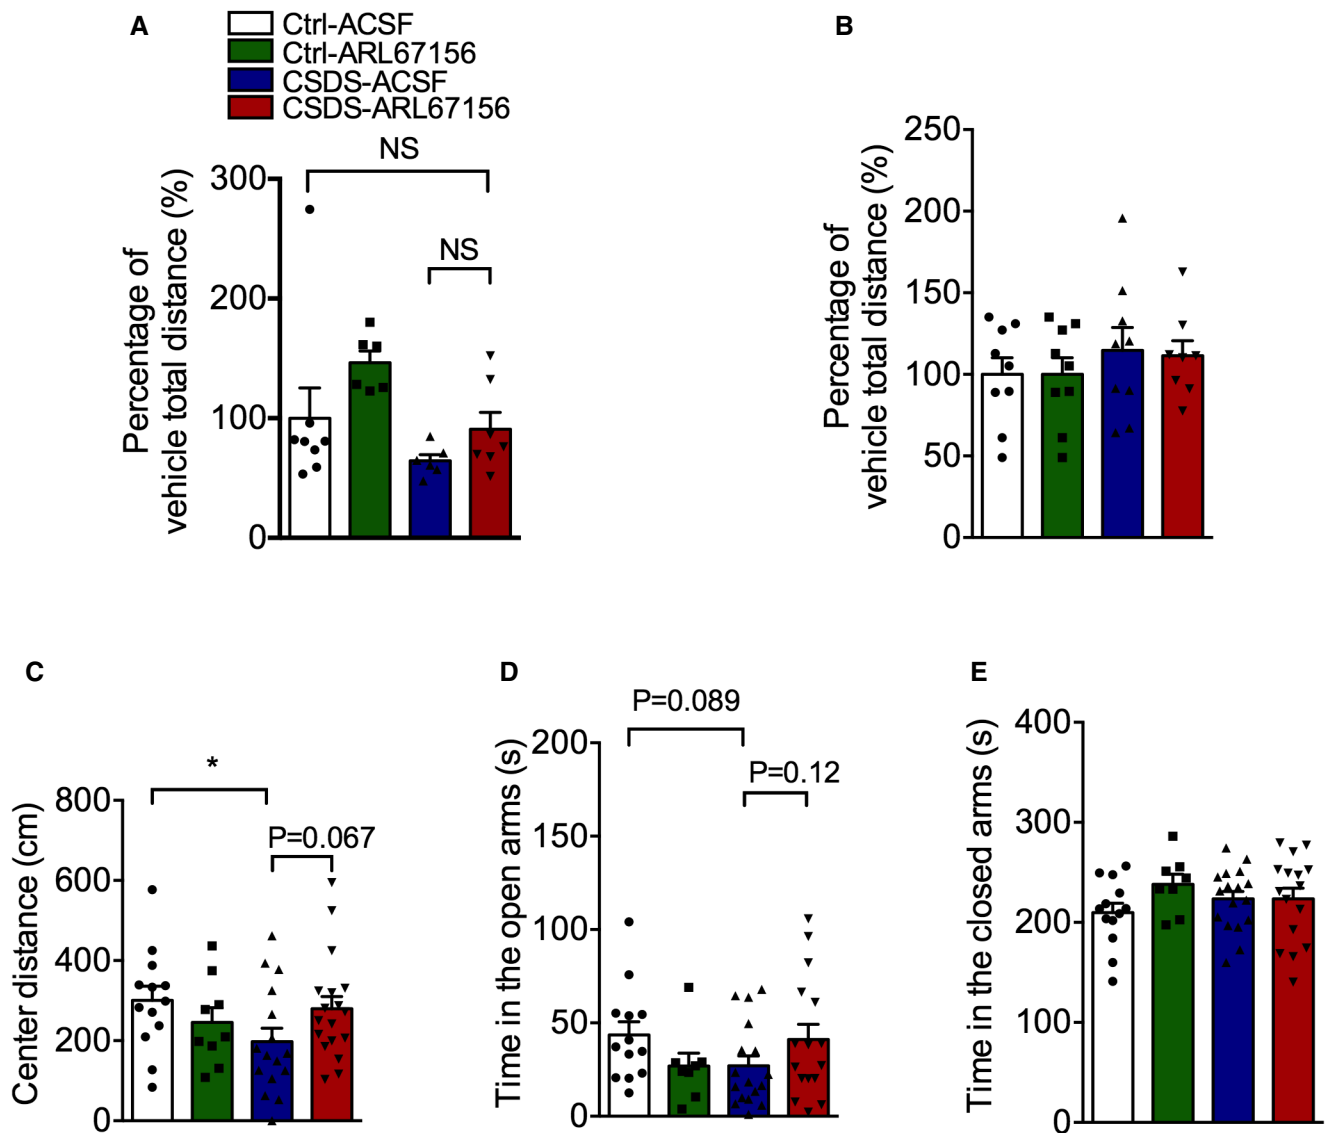

**Figure EV3. The effects of ARL67156 on locomotor activity and anxiety behaviors of mice.**

- A** The locomotor activity of susceptible mice with ARL67156 (100  $\mu$ M) infusion into the right cerebral ventricle in the open field test ( $n = 8, 6, 6, 7$  mice; Interaction  $F_{1,23} = 0.3174, P = 0.5786$ ; Group  $F_{1,23} = 6.619, P = 0.0170$ ; Drug  $F_{1,23} = 4.226, P = 0.0513$ , two-way ANOVA with Tukey's post-test).
- B** The locomotor activity of mice with ARL67156 (100  $\mu$ M) infusion into the hippocampus in the open field test ( $n = 9, 9, 9, 8$  mice; Interaction  $F_{1,31} = 0.1670, P = 0.6856$ ; Group  $F_{1,31} = 0.8477, P = 0.3643$ ; Drug  $F_{1,31} = 0.01314, P = 0.9095$ , two-way ANOVA with Tukey's post-test).
- C** The distance spent in center zone of stressed mice with ARL67156 (100  $\mu$ M) in the OFT ( $n = 13, 9, 16, 18$  mice; Treatment  $F_{3,52} = 1.880, P = 0.1444$ ; CSDS – ACSF versus Ctrl – ACSF,  $P = 0.0346$ ; CSDS – ARL67156 versus CSDS – ACSF,  $P = 0.0671$ , one-way ANOVA with Fisher's LSD test).
- D, E** The anxiety behaviors of stressed mice with ARL67156 (100  $\mu$ M) accessing by the open arms (D) and the closed arms (E) in the EPM test ( $n = 13, 8, 17, 16$  mice; for the open arms, Treatment  $F_{3,50} = 1.569, P = 0.2086$ ; CSDS – ACSF versus Ctrl – ACSF,  $P = 0.0891$ ; CSDS – ARL67156 versus CSDS – ACSF,  $P = 0.1234$ ; for the closed arms, Treatment  $F_{3,50} = 1.063, P = 0.3731$ , one-way ANOVA with Fisher's LSD test).

Data information: Data are expressed as the means  $\pm$  SEM. NS  $P > 0.05$ ; \* $P < 0.05$ . Ctrl, control. Source data are available online for this figure.

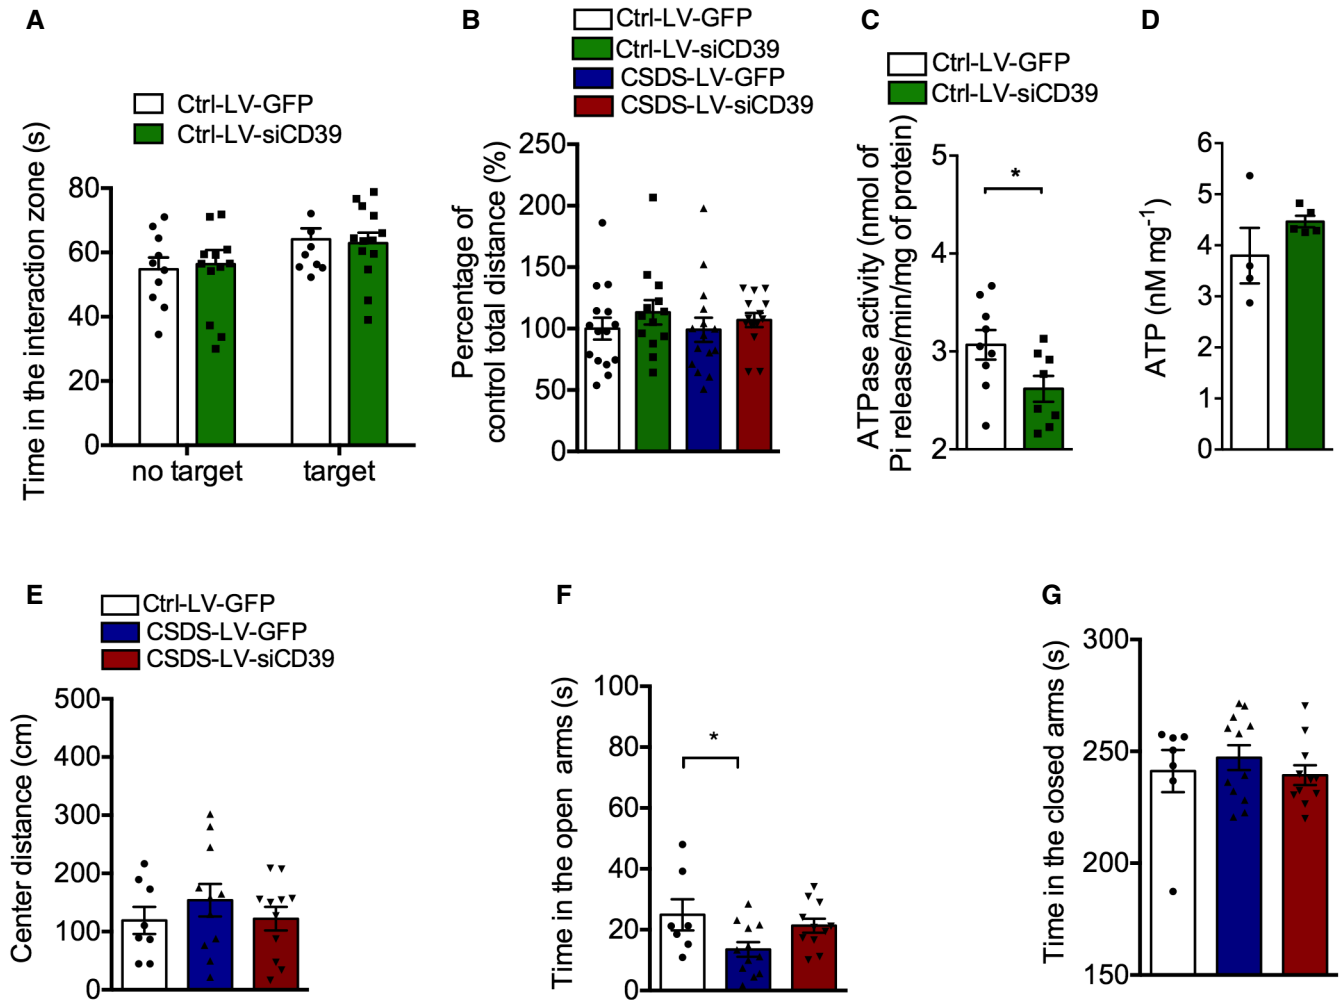

**Figure EV4. The effect of LV-siCD39 on locomotor activity and anxiety behaviors of mice exposure to chronic stress.**

- A The social interaction time of control mice after knocking down CD39 ( $n = 10, 13$  mice; Interaction  $F_{1,42} = 0.1334$ ,  $P = 0.7167$ ; Group  $F_{1,42} = 4.366$ ,  $P = 0.0428$ ; Drug  $F_{1,42} = 0.002565$ ,  $P = 0.9598$ , two-way ANOVA with Tukey's post-test).
- B The locomotor activity of mice with LV-siCD39 infusion into hippocampus in the open field test ( $n = 15, 13, 15, 14$  mice; Interaction  $F_{1,53} = 0.09372$ ,  $P = 0.7607$ ; Group  $F_{1,53} = 0.1669$ ,  $P = 0.6845$ ; Drug  $F_{1,53} = 1.450$ ,  $P = 0.2339$ , two-way ANOVA with Tukey's post-test).
- C The ATPase activity of control mice with LV-siCD39 intra-hippocampal infusion ( $n = 9, 8$  mice;  $P = 0.043$ , Student's  $t$ -test).
- D The ATP level of control mice with LV-siCD39 intra-hippocampal infusion ( $n = 4, 5$  mice;  $P = 0.2181$ , Student's  $t$ -test).
- E The center distance of stressed mice with LV-siCD39 in the OFT ( $n = 8, 11, 11$  mice; Treatment,  $F_{2,27} = 0.6317$ ,  $P = 0.5394$ , one-way ANOVA with Fisher's LSD test).
- F, G Time spent in the open arms (F) and closed arms (G) of stressed mice with LV-siCD39 in EPM test ( $n = 7, 12, 11$  mice; for open arms, Treatment,  $F_{2,27} = 3.650$ ,  $P = 0.0395$ ; CSDS – LV-GFP versus Ctrl – LV-GFP,  $P = 0.0183$ ; for closed arms, Treatment,  $F_{2,27} = 0.5164$ ,  $P = 0.6024$ , one-way ANOVA with Fisher's LSD test).

Data information: Data are expressed as the means  $\pm$  SEM. \* $P < 0.05$ , \*\* $P < 0.05$ .  
Source data are available online for this figure.

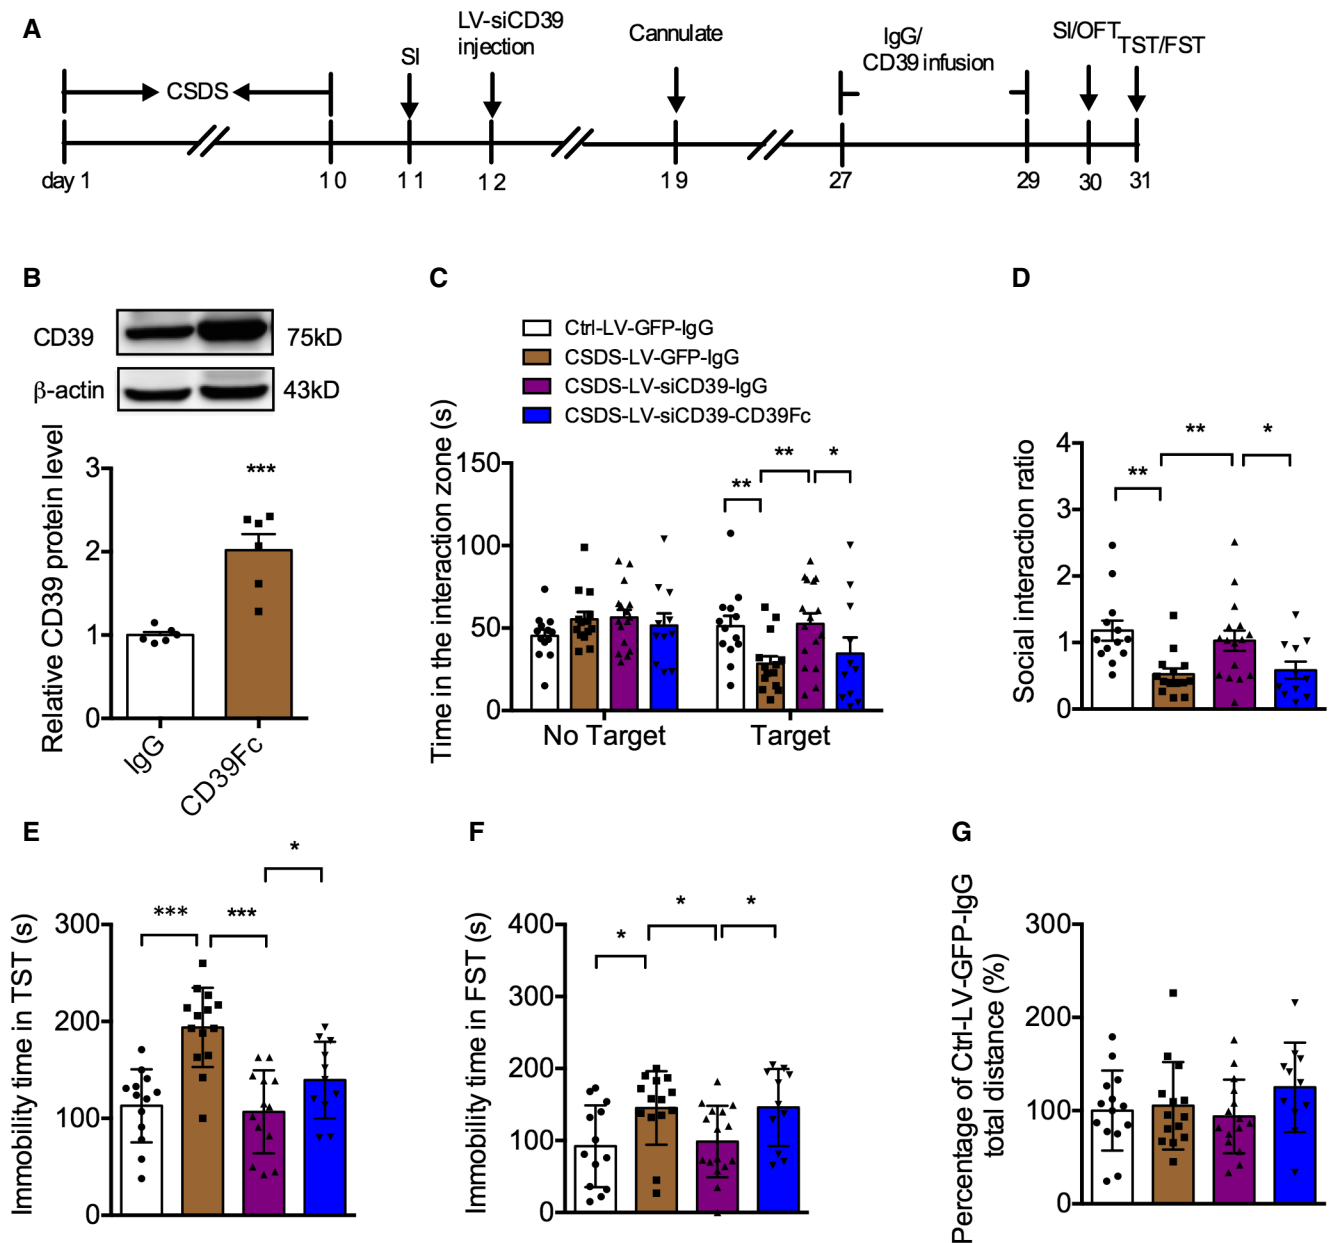

**Figure EV5. The effect of extracellular recombinant CD39 protein (CD39Fc) on depressive behaviors of stressed mice infusion with LV-siCD39.**

- A Experimental timelines.
- B Expression of CD39 in the hippocampus of mice injected with CD200Fc ( $n = 6$  mice/group; CD39Fc versus IgG,  $P = 0.0004$ , Student's  $t$ -test).
- C Time in the interaction zone of mice infusion with CD39Fc after knockdown of CD39 in SI test ( $n = 13, 14, 16, 11$  mice; Interaction,  $F_{3,100} = 2.977$ ,  $P = 0.0352$ ; Target,  $F_{3,100} = 6.175$ ,  $P = 0.0146$ ; Drug,  $F_{3,100} = 2.028$ ,  $P = 0.1148$ ; for target, CSDS-LV-GFP-IgG versus Ctrl-LV-GFP-IgG,  $P = 0.0077$ ; CSDS-LV-siCD39-IgG versus CSDS-LV-GFP-IgG,  $P = 0.0031$ ; CSDS-LV-siCD39-CD39Fc versus CSDS-LV-siCD39-IgG,  $P = 0.0378$ , two-way ANOVA with Tukey's post-test).
- D Social interaction ratio of mice infusion with CD39Fc after knockdown of CD39 in SI test ( $n = 13, 14, 16, 11$  mice; Treatment,  $F_{3,50} = 5.690$ ,  $P = 0.0020$ ; CSDS-LV-GFP-IgG versus Ctrl-LV-GFP-IgG,  $P = 0.0012$ ; CSDS-LV-siCD39-IgG versus CSDS-LV-GFP-IgG,  $P = 0.0075$ ; CSDS-LV-siCD39-CD39Fc versus CSDS-LV-siCD39-IgG,  $P = 0.0263$ , one-way ANOVA with Fisher's LSD test).
- E, F Infusion with CD39Fc into hippocampus abolished the decreased immobility time of stressed mice injection with LV-siCD39 in the TST (E) and FST (F) (for TST,  $n = 13, 14, 13, 11$ ; Treatment,  $F_{3,47} = 13.22$ ,  $P < 0.0001$ ; CSDS-LV-GFP-IgG versus Ctrl-LV-GFP-IgG,  $P < 0.0001$ ; CSDS-LV-siCD39-IgG versus CSDS-LV-GFP-IgG,  $P < 0.0001$ ; CSDS-LV-siCD39-CD39Fc versus CSDS-LV-siCD39-IgG,  $P = 0.05$ ; for FST,  $n = 13, 14, 16, 11$ ; Treatment,  $F_{3,50} = 4.047$ ,  $P = 0.0119$ ; CSDS-LV-GFP-IgG versus Ctrl-LV-GFP-IgG,  $P = 0.0116$ ; CSDS-LV-siCD39-IgG versus CSDS-LV-GFP-IgG,  $P = 0.191$ ; CSDS-LV-siCD39-CD39Fc versus CSDS-LV-siCD39-IgG,  $P = 0.0261$ , one-way ANOVA with Fisher's LSD test).
- G Total distance of mice in the OFT ( $n = 14, 14, 15, 11$  mice; Treatment,  $F_{3,50} = 1.136$ ,  $P = 0.3437$ , one-way ANOVA with Fisher's LSD test).

Data information: Data are expressed as the means  $\pm$  SEM. \* $P < 0.05$ , \*\* $P < 0.01$ , \*\*\* $P < 0.001$ .  
Source data are available online for this figure.
