# Supplementary material
Source: PubMed Central journal article supplement (PMC7132197)
Supplement: EMBR-21-e47857-s005.pdf [file EMBR-21-e47857-s005.pdf]

| <b>Figure and N of animals</b> | <b>Statistical analysis</b> | <b>Post hoc tests</b>    | <b>Mean±s.e.m.</b>               |
|--------------------------------|-----------------------------|--------------------------|----------------------------------|
| 2B                             | Two-way ANOVA               | Tukey's multiple         |                                  |
| Control(n=8)                   | F (3, 34) = 3.917, P        | comparisons test         | C NT 35.84±3.615 T 54.59±4.844   |
| 40(n=10)                       | = 0.0167                    | Vehicle vs. Apyrase      | 40 NT 41.15±3.74 T 39.48±8.44    |
| 80(n=10)                       | F (1, 34) = 0.0004,         | 40U/ml P=0.2569          | 80 NT 37.11±6.45 T 19.16±4.91    |
| 160(n=10)                      | P = 0.9834                  | Vehicle vs. Apyrase      | 160 NT 34.58±5.312 T 35.76±6.022 |
|                                | F (3, 34) = 2.295, P        | 80U/ml P=0.0008          |                                  |
|                                | = 0.0954                    |                          |                                  |
| 2C                             | One-way ANOVA               | Uncorrected Fisher's LSD |                                  |
| Control(n=8)                   | F (3, 34) = 2.87, P         | Vehicle vs. Apyrase      | C 84.83±4.099                    |
| 40(n=10)                       | = 0.0505                    | 40U/ml P=0.1748          | 40 73.25±7.207                   |
| 80(n=9)                        |                             | Vehicle vs. Apyrase      | 80 60.27±5.063                   |
| 160(n=11)                      |                             | 80U/ml P=0.007           | 160 76.09±5.312                  |
| 2E                             | Two-way ANOVA               | Tukey's multiple         |                                  |
| Vehicle(n=14)                  | F (1, 32) = 7.0754          | comparisons test         | Veh NT 40.5±3.22 T 46.2±3.85     |
| 40(n=20)                       | P = 0.0121                  | NT Vehicle vs. Apyrase   | 40 NT 30.4±3.73 T 19.5±3.32      |
|                                | F (1, 32) = 0.68447         | 40U/ml P=0.1221          |                                  |
|                                | P = 0.4142                  | Target Vehicle vs.       |                                  |
|                                | F (1, 32) = 18.211          | Apyrase 40U/ml           |                                  |
|                                | P = 0.0002                  | P<0.0001                 |                                  |
| 2F                             | t tests                     |                          |                                  |
| Vehicle(n=10)                  | P = 0.0003                  |                          | Veh 86.50 ± 1.460                |
| 40(n=16)                       |                             |                          | 40 63.00 ± 4.269                 |
| 2G                             | Two-way ANOVA               | Tukey's multiple         |                                  |
| Vehicle(n=14)                  | F (2, 31) = 2.051, P        | comparisons test         | Veh NT 42.4±2.65 T 49.3±3.71     |
| ACSF(n=10)                     | = 0.1457                    | Vehicle vs. ACSF         | ACSF NT 36.1±4.11 T 32±5.31      |
| ATP(N=10)                      | F (1, 31) = 2.666, P        | P=0.0387                 | ATP NT 36.7±4.39 T 54.5±8.11     |
|                                | = 0.1127                    | ACSF vs. ATP P=0.0099    |                                  |
|                                | F (2, 31) = 3.711, P        |                          |                                  |
|                                | = 0.0359                    |                          |                                  |
| 2H                             | One-way ANOVA               | Uncorrected Fisher's LSD |                                  |
| Vehicle(n=10)                  | F (2, 23) = 3.32, P         | Vehicle vs. ACSF         | Veh 86.01±2.683                  |
| ACSF(n=8)                      | = 0.0540                    | P=0.0466                 | ACSF 69.65±6.506                 |
| ATP(N=8)                       |                             | ACSF vs. ATP P=0.8759    | ATP 68.35±7.517                  |
