# Supplementary material
Source: PubMed Central journal article supplement (PMC7132197)
Supplement: EMBR-21-e47857-s006.pdf [file EMBR-21-e47857-s006.pdf]

| Figure and N of animals                                                    | Statistical analysis                                                                                                   | Post hoc tests                                                                                                                                                    | Mean±s.e.m.                                                                                                                                                       |
|----------------------------------------------------------------------------|------------------------------------------------------------------------------------------------------------------------|-------------------------------------------------------------------------------------------------------------------------------------------------------------------|-------------------------------------------------------------------------------------------------------------------------------------------------------------------|
| 3B<br>CON ACSF(n=7)<br>con ARL(n=7)<br>CSDS ACSF(N=5)<br>CSDS ARL(N=5)     | One-way ANOVA<br>$F_{3,20} = 16.81, P < 0.0001$                                                                        | Uncorrected Fisher's<br>LSD<br>Con ACSF vs. CSDS<br>ACSF P<0.0001<br>CSDS ACSF vs. CSDS<br>ARL67156 P=0.0405                                                      | CON ACSF 3.89±0.1518<br>con ARL 2.948±0.5272<br>CSDS ACSF 6.638±0.4251<br>CSDS ARL 5.32±0.3052                                                                    |
| 3C<br>CON ACSF(n=12)<br>con ARL(n=10)<br>CSDS ACSF(N=9)<br>CSDS ARL(N=9)   | Two-way ANOVA<br>$F(3, 36) = 5.119, P = 0.0047$<br>$F(1, 36) = 0.0050, P = 0.9437$<br>$F(3, 36) = 3.626, P = 0.0220$   | Tukey's multiple<br>comparisons test<br>Con ACSF vs. Con<br>ARL67156 P=0.8094<br>Con ACSF vs. CSDS<br>ACSF P=0.0001<br>CSDS ACSF vs. CSDS<br>ARL67156 P=0.0054    | CON ACSF NT 39.89±3.6 T<br>46.44±6.4<br>con ARL NT 31.58±4.41 T<br>39.73±7.26<br>CSDS ACSF NT 32.88±4.87<br>T 11.13±3.17<br>CSDS ARL NT 33.4±4.32 T<br>39.57±6.13 |
| 3D<br>CON ACSF(n=12)<br>con ARL(n=10)<br>CSDS ACSF(N=10)<br>CSDS ARL(N=10) | Two-way ANOVA<br>$F(1, 38) = 5.352, P = 0.0262$<br>$F(1, 38) = 5.711, P = 0.0219$<br>$F(1, 38) = 9.703, P = 0.0035$    | Tukey's multiple<br>comparisons test<br>Con: ARL67156 vs.<br>CSDS: ACSF P=0.0027<br>Con ACSF vs. CSDS<br>ACSF P=0.0083<br>CSDS ACSF vs. CSDS<br>ARL67156 P=0.0031 | CON ACSF 77.3±4.785<br>con ARL 81.09±3.027<br>CSDS ACSF 55.1±6.716<br>CSDS ARL 80.73±3.211                                                                        |
| 3E<br>CON ACSF(n=9)<br>con ARL(n=9)<br>CSDS ACSF(N=9)<br>CSDS ARL(N=8)     | Two-way ANOVA<br>$F(3, 31) = 5.579, P = 0.0035$<br>$F(1, 31) = 0.5121, P = 0.4796$<br>$F(3, 31) = 8.367, P = 0.0003$   | Tukey's multiple<br>comparisons test<br>Con ACSF vs. Con<br>ARL67156 P=0.4733<br>Con ACSF vs. CSDS<br>ACSF P< 0.0001<br>CSDS ACSF vs. CSDS<br>ARL67156 P=0.0131   | CON ACSF NT 43.52±3.12<br>T 57.31±5.09<br>con ARL NT 42.13±2.7 T<br>49.56±3.68<br>CSDS ACSF NT 39.9±2.38<br>T 24.5±3.37<br>CSDS ARL NT 39.95±2.7 T<br>41.85±4.9   |
| 3F<br>CON ACSF(n=9)<br>con ARL(n=9)<br>CSDS ACSF(N=9)<br>CSDS ARL(N=8)     | Two-way ANOVA<br>$F(1, 30) = 0.3342, P = 0.5675$<br>$F(1, 30) = 17.22, P = 0.0003$<br>$F(1, 30) = 0.05903, P = 0.8097$ | Tukey's multiple<br>comparisons test<br>CON: ACSF vs. CSDS:<br>ACSF P=0.0761<br>CSDS: ACSF vs. CSDS:<br>ARL67156 P=0.9419                                         | CON ACSF 83.67±1.6<br>con ARL 84.98±1.67<br>CSDS ACSF 69.67±5.351<br>CSDS ARL 66.46±5.846                                                                         |
| 3G<br>CON ACSF(n=16)<br>con ARL(n=12)<br>CSDS ACSF(N=21)<br>CSDS ARL(N=19) | One-way ANOVA<br>$F_{3,64} = 13.61, P < 0.0001$                                                                        | Uncorrected Fisher's<br>LSD<br>Con ACSF vs. CSDS<br>ACSF P=0.0059                                                                                                 | CON ACSF 130.7±8.266<br>con ARL 71.82±18.3<br>CSDS ACSF 173.3±8.920<br>CSDS ARL 117.4±10.29                                                                       |

---

|                 |                         |                                                                                 |                       |
|-----------------|-------------------------|---------------------------------------------------------------------------------|-----------------------|
|                 |                         | Con ARL67156 vs Con<br>ACSF P=0.0011<br>CSDS ACSF vs. CSDS<br>ARL67156 P=0.0002 |                       |
| 3H              | One-way ANOVA           | Uncorrected Fisher's                                                            |                       |
| CON ACSF(n=21)  | $F_{3,71} = 12.94, P <$ | LSD                                                                             | CON ACSF 115.6±8.665  |
| con ARL(n=12)   | 0.0001                  | Con ACSF vs. CSDS                                                               | con ARL 87.7±10.56    |
| CSDS ACSF(N=23) |                         | ACSF P=0.0036                                                                   | CSDS ACSF 149.5±5.336 |
| CSDS ARL(N=19)  |                         | Con ARL67156 vs Con<br>ACSF P=0.0428<br>CSDS ACSF vs. CSDS<br>ARL67156 P<0.0001 | CSDS ARL 84.29±10.58  |

---
