# Supplementary material
Source: PubMed Central journal article supplement (PMC7132197)
Supplement: EMBR-21-e47857-s009.pdf [file EMBR-21-e47857-s009.pdf]

| <b>Figure and N of animals</b>                            | <b>Statistical analysis</b>                      | <b>Post hoc tests</b>                                                                                     | <b>Mean±s.e.m.</b>                                                              |
|-----------------------------------------------------------|--------------------------------------------------|-----------------------------------------------------------------------------------------------------------|---------------------------------------------------------------------------------|
| 6B<br>CON GFP(n=15)<br>CSDS GFP(n=15)<br>CSDS CD39(N=15)  | One-way ANOVA<br>F (2, 42) = 3.12, P = 0.0544    | Uncorrected Fisher's LSD<br>Con LV-GFP vs. CSDS LV-GFP P=0.0312<br>CSDS LV-GFP vs. CSDS LV-CD39 P=0.0425  | CON GFP 2.88±0.1671<br>CSDS GFP 2.34±0.139<br>CSDS CD39 2.847±0.2019            |
| 6C<br>CON GFP(n=15)<br>CSDS GFP(n=15)<br>CSDS CD39(N=15)  | One-way ANOVA<br>F (2, 42) = 10.93, P = 0.0002   | Uncorrected Fisher's LSD<br>Con LV-GFP vs. CSDS LV-GFP P=0.0026<br>CSDS LV-GFP vs. CSDS LV-CD39 P< 0.0001 | CON GFP 1.187±0.1414<br>CSDS GFP 0.6667±0.1036<br>CSDS CD39 1.407±0.09435       |
| 6D<br>CON GFP(n=15)<br>CSDS GFP(n=15)<br>CSDS CD39(N=15)  | One-way ANOVA<br>$F_{2,42} = 0.34$ , P = 0.7161  | Uncorrected Fisher's LSD<br>Con LV-GFP vs. CSDS LV-GFP P=0.5191<br>CSDS LV-GFP vs. CSDS LV-CD39 P=0.9142  | CON GFP 0.52±0.08177<br>CSDS GFP 0.44±0.08153<br>CSDS CD39 0.4267±0.09684       |
| 6E<br>CON GFP(n=15)<br>CSDS GFP(n=15)<br>CSDS CD39(N=15)  | One-way ANOVA<br>$F_{2,42} = 1.00$ , P = 0.3758  | Uncorrected Fisher's LSD<br>Con LV-GFP vs. CSDS LV-GFP P=0.6249<br>CSDS LV-GFP vs. CSDS LV-CD39 P=0.1702  | CON GFP 1.160±0.1341<br>CSDS GFP 1.240±0.1129<br>CSDS CD39 1.013±0.09404        |
| 6G<br>CON ACSF(n=11)<br>CSDS ACSF(n=13)<br>CSDS ARL(N=10) | One-way ANOVA<br>$F_{2,31} = 4.474$ , P = 0.0196 | Uncorrected Fisher's LSD<br>Con ACSF vs. CSDS ACSF P=0.0366<br>CSDS ACSF vs. CSDS ARL P=0.0086            | CON ACSF 1.546±0.2752<br>CSDS ACSF 0.9279±0.1238<br>CSDS ARL 1.742±0.2125       |
| 6H<br>CON ACSF(n=11)<br>CSDS ACSF(n=13)<br>CSDS ARL(N=10) | One-way ANOVA<br>$F_{2,31} = 3.327$ , P=0.0491   | Uncorrected Fisher's LSD<br>Con ACSF vs. CSDS ACSF P=0.1026<br>CSDS ACSF vs. CSDS ARL P=0.0179            | CON ACSF 0.2292±0.06279<br>CSDS ACSF 0.09096±0.03335<br>CSDS ARL 0.3020±0.08439 |
| 6I<br>CON ACSF(n=11)<br>CSDS ACSF(n=13)<br>CSDS ARL(N=10) | One-way ANOVA<br>$F_{2,31} = 1.986$ , P = 0.1543 | Uncorrected Fisher's LSD<br>Con ACSF vs. CSDS ACSF P=0.1172<br>CSDS ACSF vs. CSDS ARL P=0.0868            | CON ACSF 0.2854±0.05548<br>CSDS ACSF 0.1911±0.01982<br>CSDS ARL 0.2974±0.05086  |
| 6J<br>CON ACSF(n=11)<br>CSDS ACSF(n=13)<br>CSDS ARL(N=10) | One-way ANOVA<br>$F_{2,31} = 1.475$ , P = 0.2445 | Uncorrected Fisher's LSD<br>Con ACSF vs. CSDS ACSF P=0.2511<br>CSDS ACSF vs. CSDS ARL P=0.1096            | CON ACSF 1.031±0.1840<br>CSDS ACSF 0.7815±0.1443<br>CSDS ARL 1.143±0.1275       |
